# Supplementary material for: A high-performance asymmetric supercapacitor based on vanadyl phosphate/carbon nanocomposites and polypyrrole-derived carbon nanowires
Source: Royal Society of Chemistry journal article supplement (doi:10.1039/c7nr08909k), 2018-01-01
Supplement: c7nr08909k1.pdf [file c7nr08909k1.pdf]

1 **Supplementary Information**

2

3 **High-performance asymmetric supercapacitor based on**  
4 **vanadyl phosphate/carbon nanocomposite and**  
5 **polypyrrole-derived carbon nanowire**

6

7 Ningna Chen,<sup>a</sup> Jinhua Zhou,<sup>a</sup> Guoyin Zhu,<sup>a</sup> Qi Kang,<sup>b</sup> Hongmei Ji,<sup>a</sup> Yu Zhang,<sup>a</sup>  
8 Xizhang Wang,<sup>a</sup> Luming Peng,<sup>a</sup> Xuefeng Guo,<sup>a</sup> Chunliang Lu,<sup>c</sup> Jing Chen,<sup>d</sup> Xiaomiao  
9 Feng,<sup>b</sup> Wenhua Hou<sup>a,\*</sup>

10

11

12 <sup>a</sup> Key Laboratory of Mesoscopic Chemistry of MOE, School of Chemistry and  
13 Chemical Engineering, Nanjing University, Nanjing 210023, P. R. China.

14 <sup>b</sup> Key Laboratory for Organic Electronics & Information Displays, Institute of  
15 Advanced Materials, School of Materials Science & Engineering, Nanjing University  
16 of Posts and Telecommunications, Nanjing 210046, P. R. China.

17 <sup>c</sup> Analytical Testing Center, Yangzhou University, Yangzhou 225009, P. R. China.

18 <sup>d</sup> College of Chemistry and Molecular Engineering, Nanjing Tech University, Nanjing  
19 211816, P. R. China.

20

21 Corresponding author. Tel: (+86)-25-89686001

22 E-mail address: whou@nju.edu.cn

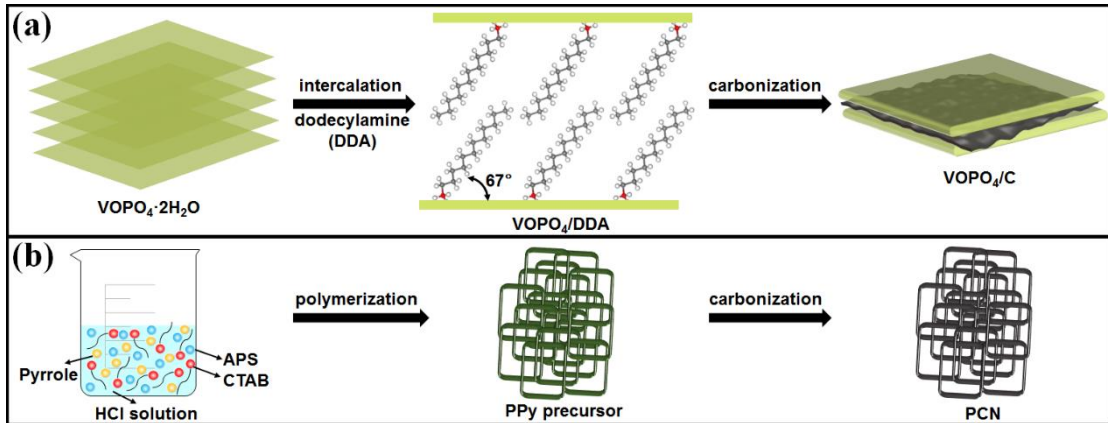

1

2 **Scheme S1.** Schematic illustration for the synthesis of (a) VOPO<sub>4</sub>/C nanocomposites  
 3 and (b) PPy-derived carbon nanowires (PCN).

4

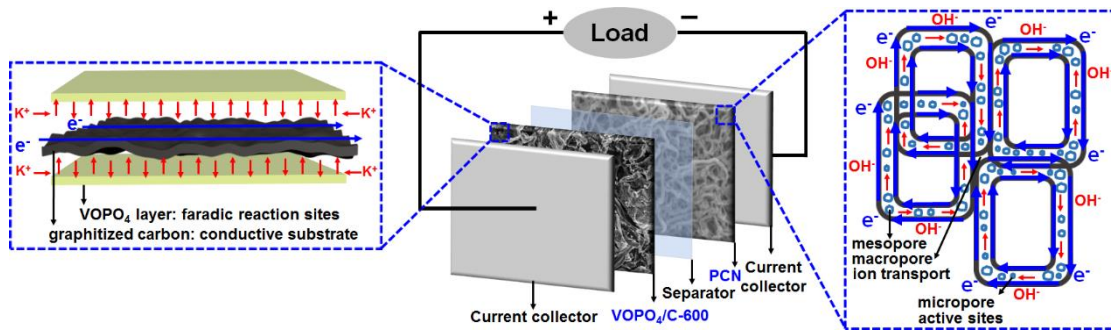

5

6 **Scheme S2.** Schematic representation for the charge and discharge mechanism of  
 7 VOPO<sub>4</sub>/C-600//PCN asymmetric supercapacitor in aqueous KOH electrolyte.

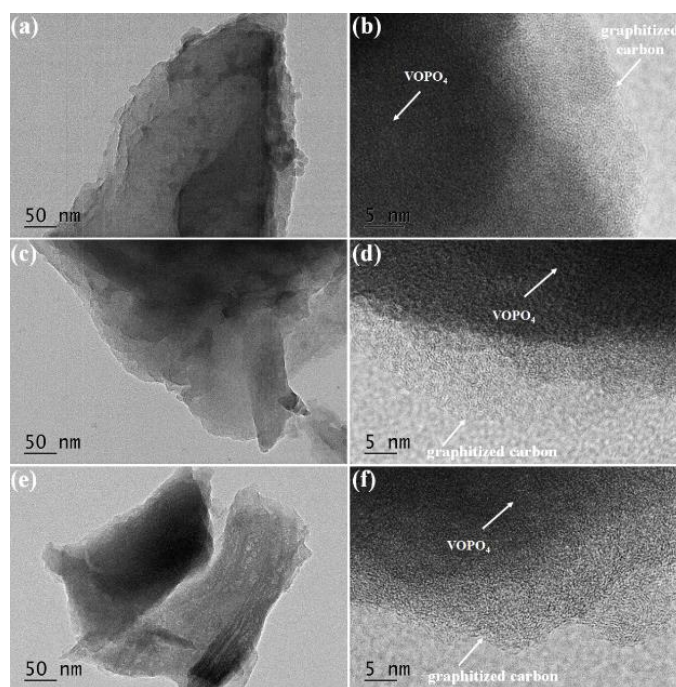

1

2 **Fig. S1** TEM images at different magnifications of VOPO<sub>4</sub>/C-400 (a, b)

3 VOPO<sub>4</sub>/C-600 (c, d) and VOPO<sub>4</sub>/C-800 (e, f), respectively.

4

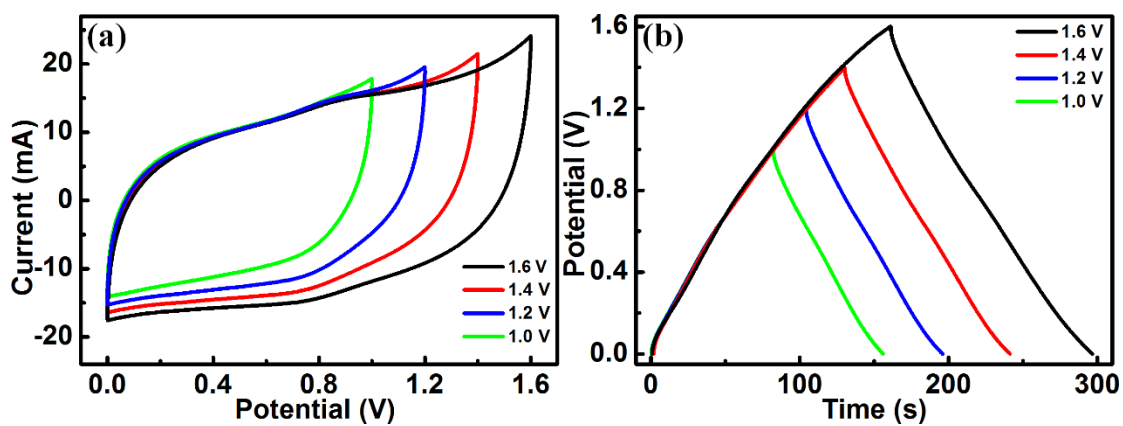

5

6 **Fig. S2** (a) Cyclic voltammetry curves of VOPO<sub>4</sub>/C-600//PCN asymmetric

7 supercapacitor at increasing voltage window from 1.0 V to 1.6 V, all acquired at 100

8 mV·s<sup>-1</sup> and (b) Corresponding galvanostatic charge-discharge curves at a current

9 density of 1.0 A·g<sup>-1</sup> from 1.0 V to 1.6 V.

10

11

1 **Table S1** Results of XPS peak fitting for (a) VOPO<sub>4</sub>/C-400, (b) VOPO<sub>4</sub>/C-600 and (c)  
 2 VOPO<sub>4</sub>/C-800 in the C 1s region.

| (a) Peak | Position (eV) | Relative peak area (%) | FWHM (eV) |
|----------|---------------|------------------------|-----------|
| O-C=O    | 288.5         | 4.1                    | 1.7       |
| C=O      | 287.0         | 6.8                    | 1.4       |
| C-O      | 286.0         | 13.3                   | 1.3       |
| C-C/C=C  | 284.8         | 75.8                   | 1.3       |
| (b) Peak | Position (eV) | Relative peak area (%) | FWHM (eV) |
| O-C=O    | 288.6         | 3.6                    | 1.9       |
| C=O      | 286.9         | 6.0                    | 1.2       |
| C-O      | 286.0         | 12.0                   | 1.2       |
| C-C/C=C  | 284.8         | 78.4                   | 1.2       |
| (c) Peak | Position (eV) | Relative peak area (%) | FWHM (eV) |
| O-C=O    | 288.6         | 3.7                    | 1.8       |
| C=O      | 286.8         | 6.1                    | 1.1       |
| C-O      | 286.0         | 12.4                   | 1.1       |
| C-C/C=C  | 284.8         | 77.8                   | 1.2       |

3

4

5

6

7

8

9

10

11

12

13

14

15

1 **Table S2** Results of XPS peak fitting for (a) VOPO<sub>4</sub>·2H<sub>2</sub>O, (b) VOPO<sub>4</sub>/C-400, (c)  
 2 VOPO<sub>4</sub>/C-600 and (d) VOPO<sub>4</sub>/C-800 in the V 2p region.

| (a) Peak                             | Position (eV) | Relative peak area (%) | FWHM (eV) |
|--------------------------------------|---------------|------------------------|-----------|
| V <sup>+5</sup> (2p <sub>1/2</sub> ) | 525.6         | 17.0                   | 2.4       |
| V <sup>+4</sup> (2p <sub>1/2</sub> ) | 524.2         | 9.9                    | 2.6       |
| V <sup>+5</sup> (2p <sub>3/2</sub> ) | 518.5         | 48.2                   | 1.1       |
| V <sup>+4</sup> (2p <sub>3/2</sub> ) | 516.9         | 24.9                   | 1.8       |
| (b) Peak                             | Position (eV) | Relative peak area (%) | FWHM (eV) |
| V <sup>+5</sup> (2p <sub>1/2</sub> ) | 525.0         | 10.0                   | 1.5       |
| V <sup>+4</sup> (2p <sub>1/2</sub> ) | 524.0         | 16.8                   | 2.0       |
| V <sup>+5</sup> (2p <sub>3/2</sub> ) | 517.3         | 33.0                   | 1.8       |
| V <sup>+4</sup> (2p <sub>3/2</sub> ) | 516.7         | 40.2                   | 1.8       |
| (c) Peak                             | Position (eV) | Relative peak area (%) | FWHM (eV) |
| V <sup>+5</sup> (2p <sub>1/2</sub> ) | 525.0         | 9.4                    | 1.5       |
| V <sup>+4</sup> (2p <sub>1/2</sub> ) | 524.1         | 16.1                   | 1.9       |
| V <sup>+5</sup> (2p <sub>3/2</sub> ) | 517.4         | 32.6                   | 1.8       |
| V <sup>+4</sup> (2p <sub>3/2</sub> ) | 516.6         | 41.9                   | 1.9       |
| (d) Peak                             | Position (eV) | Relative peak area (%) | FWHM (eV) |
| V <sup>+5</sup> (2p <sub>1/2</sub> ) | 525.0         | 9.5                    | 1.4       |
| V <sup>+4</sup> (2p <sub>1/2</sub> ) | 524.0         | 19.2                   | 2.0       |
| V <sup>+5</sup> (2p <sub>3/2</sub> ) | 517.3         | 31.6                   | 1.8       |
| V <sup>+4</sup> (2p <sub>3/2</sub> ) | 516.7         | 39.7                   | 1.7       |

3

4

5

6

7

8

9

10

11

12

1 **Table S3** A comparison of specific capacitance, rate capability and cycle stability of  
 2 the present work with those reported VOPO<sub>4</sub>-based composite electrodes.

| Material                                                                 | Capacitance                                             | Rate capability                        | Cycling performance                          | Ref       |
|--------------------------------------------------------------------------|---------------------------------------------------------|----------------------------------------|----------------------------------------------|-----------|
| VOPO <sub>4</sub> /C-600 composite                                       | 469 F·g <sup>-1</sup><br>(1 A·g <sup>-1</sup> )         | 77%<br>(1 to 10 A·g <sup>-1</sup> )    | 94% (2 A·g <sup>-1</sup> for 5000 cycles)    | This work |
| Amorphous VOPO <sub>4</sub> /graphene (2:1)                              | 483 F·g <sup>-1</sup><br>(1 A·g <sup>-1</sup> )         | 74%<br>(1 to 10 A·g <sup>-1</sup> )    | 80% (2 A·g <sup>-1</sup> for 5000 cycles)    | 1         |
| VOPO <sub>4</sub> /graphene-based flexible ultrathin-film supercapacitor | 8360.5 μF·cm <sup>-2</sup><br>(0.2 A·cm <sup>-2</sup> ) | /                                      | 96% (2000 cycles)                            | 2         |
| VOPO <sub>4</sub> -graphene nanocomposite                                | 50 F·g <sup>-1</sup><br>(1 A·g <sup>-1</sup> )          | 47%<br>(1 to 10 A·g <sup>-1</sup> )    | 85% (100 mV·s <sup>-1</sup> for 5000 cycles) | 3         |
| VOPO <sub>4</sub> /RGO                                                   | 378 F·g <sup>-1</sup><br>(5 mV·s <sup>-1</sup> )        | 68%<br>(0.5 to 10 A·g <sup>-1</sup> )  | 64% (20 mV·s <sup>-1</sup> for 1000 cycles)  | 4         |
| VOPO <sub>4</sub> ·H <sub>2</sub> O                                      | 202 F·g <sup>-1</sup><br>(2 mV·s <sup>-1</sup> )        | 67.4%<br>(0.2 to 2 A·g <sup>-1</sup> ) | /                                            | 5         |

3

4

5

6

1 **Table S4** A list of gravimetric and volumetric specific capacitances of the assembled  
 2 asymmetric supercapacitor device (VOPO<sub>4</sub>/C-600//PCN) at different current densities.

| Current density<br>(A·g <sup>-1</sup> ) | Gravimetric specific<br>capacitance (F·g <sup>-1</sup> ) | Current density<br>(A·cm <sup>-3</sup> ) | Volumetric specific<br>capacitance (F·cm <sup>-3</sup> ) |
|-----------------------------------------|----------------------------------------------------------|------------------------------------------|----------------------------------------------------------|
| 1.0                                     | 84.7                                                     | 0.5                                      | 44.2                                                     |
| 2.0                                     | 75.3                                                     | 1.1                                      | 40.1                                                     |
| 4.0                                     | 68.0                                                     | 2.1                                      | 35.4                                                     |
| 8.0                                     | 58.1                                                     | 4.2                                      | 30.2                                                     |
| 10.0                                    | 52.5                                                     | 5.2                                      | 27.6                                                     |

3

4

## 5 **References**

6 1 N. N. Chen, J. H. Zhou, Q. Kang, H. M. Ji, G. Y. Zhu, Y. Zhang, S. Y. Chen, J. Chen, X. M. Feng  
 7 and W. H. Hou, *J. Power Sources*, 2017, **344**, 185-194.

8 2 C. Z. Wu, X. L. Lu, L. L. Peng, K. Xu, X. Peng, J. L. Huang, G. H. Yu and Y. Xie, *Nat. Commun.*,  
 9 2013, **4**, 2431.

10 3 K. H. Lee, Y. W. Lee, S. W. Lee, J. S. Ha, S. S. Lee and J. G. Son, *Sci. Rep.*, 2015, **5**, 13696.

11 4 Y. B. He, X. F. Yang, Y. L. Bai, J. Y. Zhang, L. P. Kang, Z. B. Lei and Z. H. Liu, *Electrochim.*  
 12 *Acta*, 2015, **178**, 312-320.

13 5 Z. Y. Luo, E. H. Liu, T. T. Hu, Z. P. Li and T. T. Liu, *Ionics*, 2015, **21**, 289-294.
